# Supplementary material for: SHOOT GROWTH1 Maintains Arabidopsis Epigenomes by Regulating IBM1
Source: PubMed Central journal article supplement (PMC3880313; doi:10.1371/journal.pone.0084687), 2014-01-03

**Figure S1**

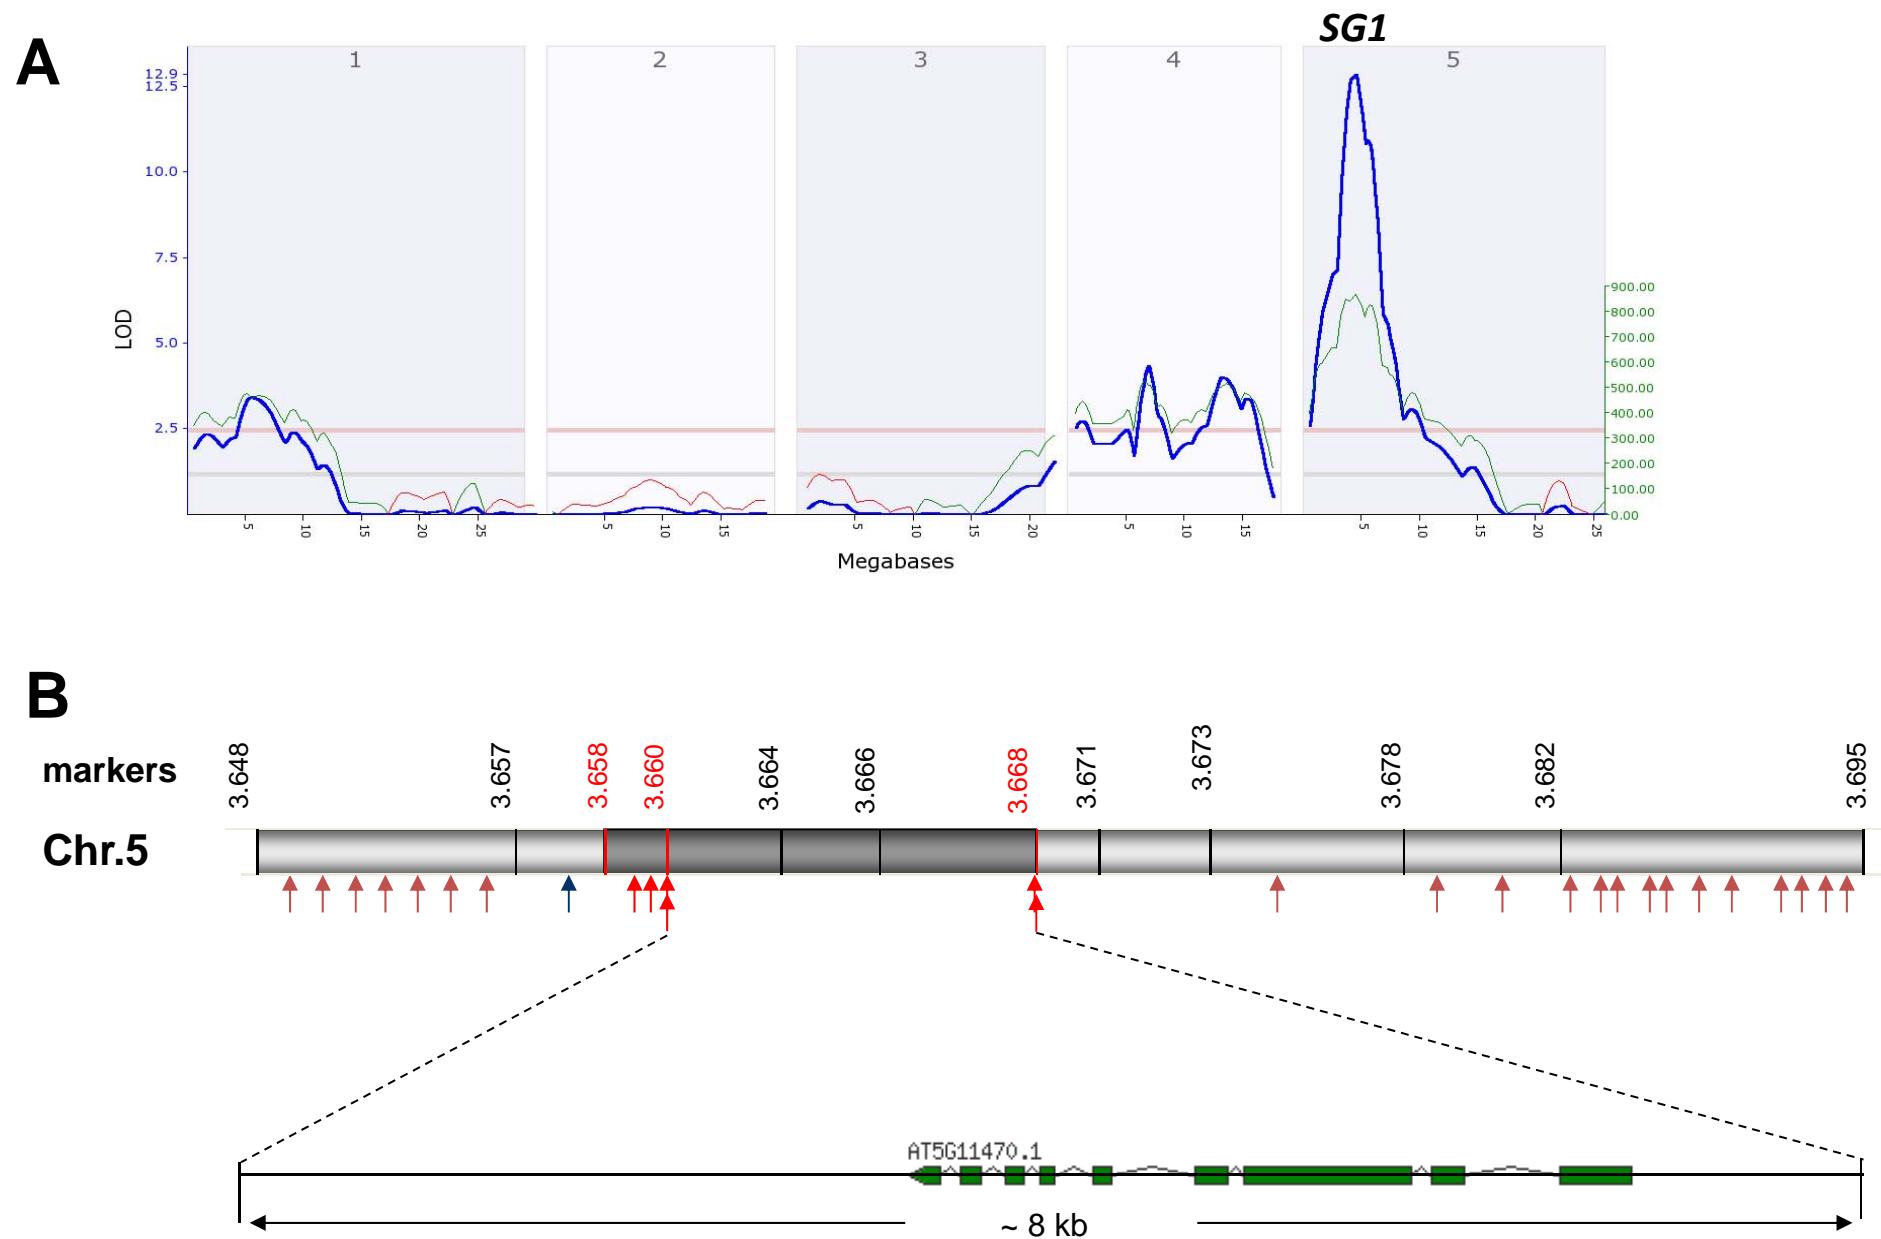



Figure S2

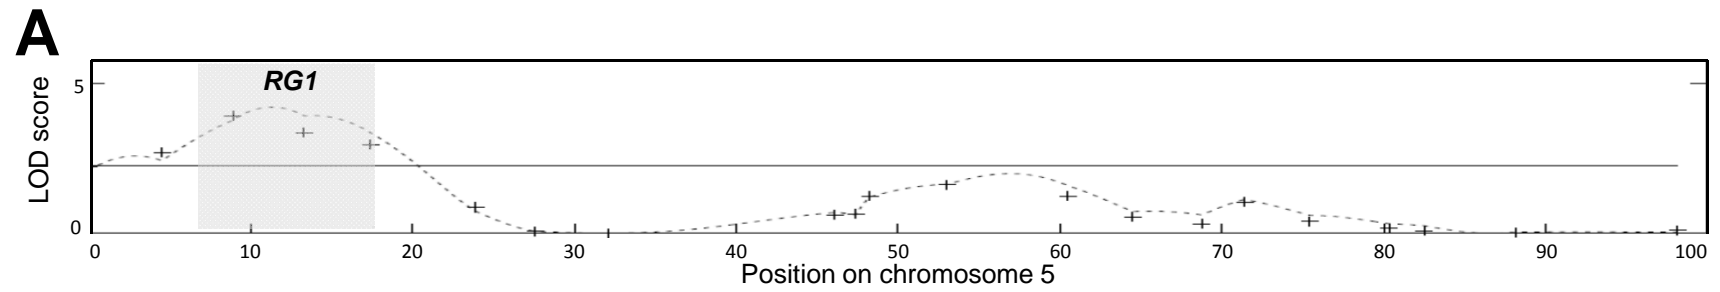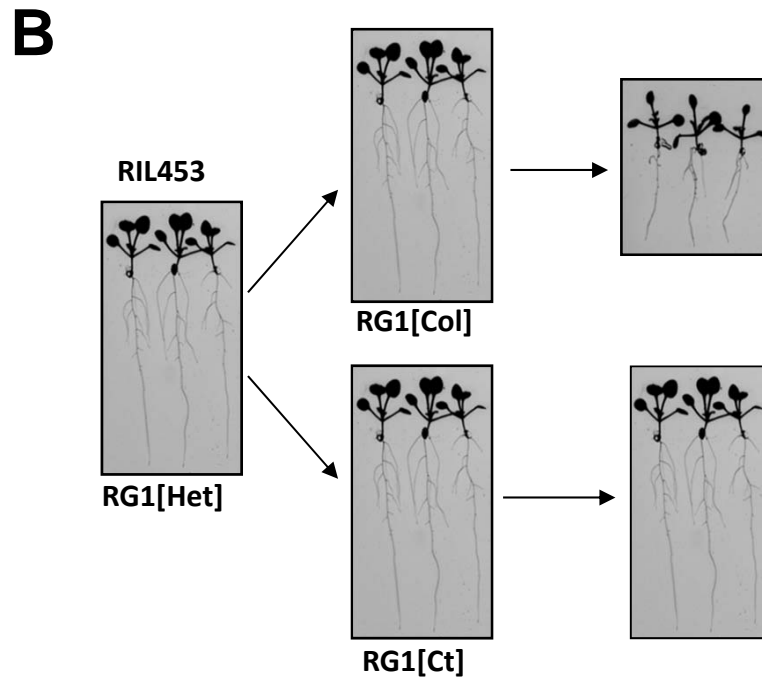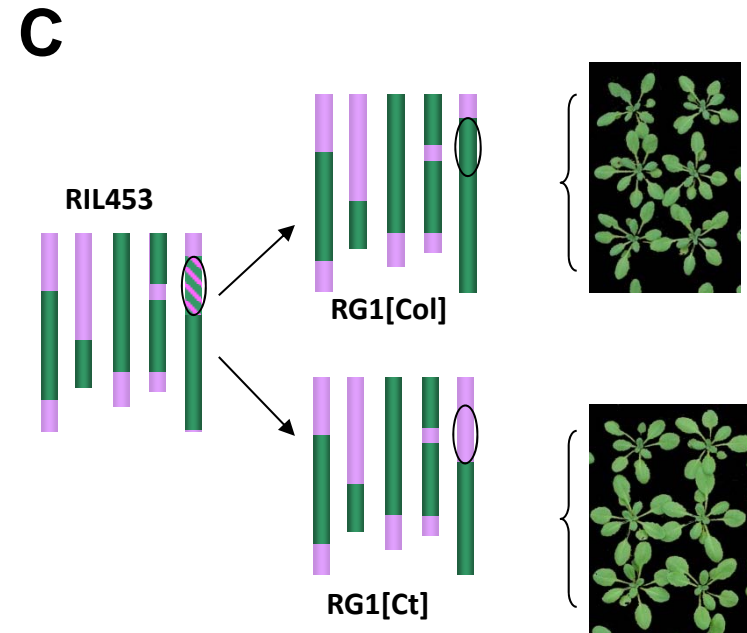



**Figure S3**

***SG1* At5g11470**

TAIR10 prediction

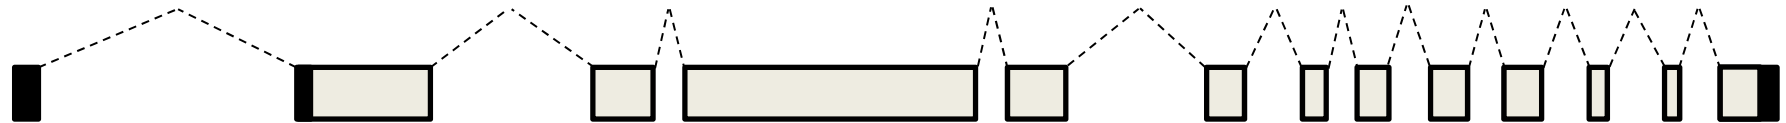

EuGène prediction

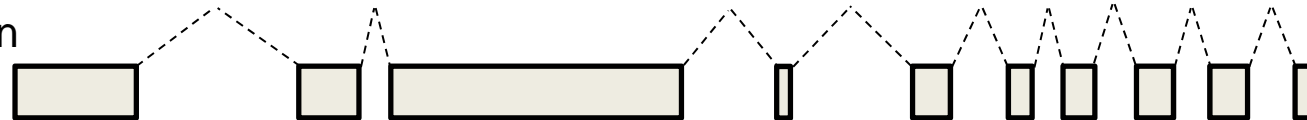

cloned cDNA

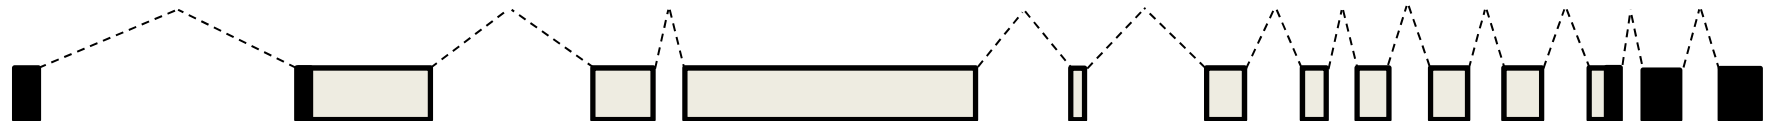



**Figure S4**

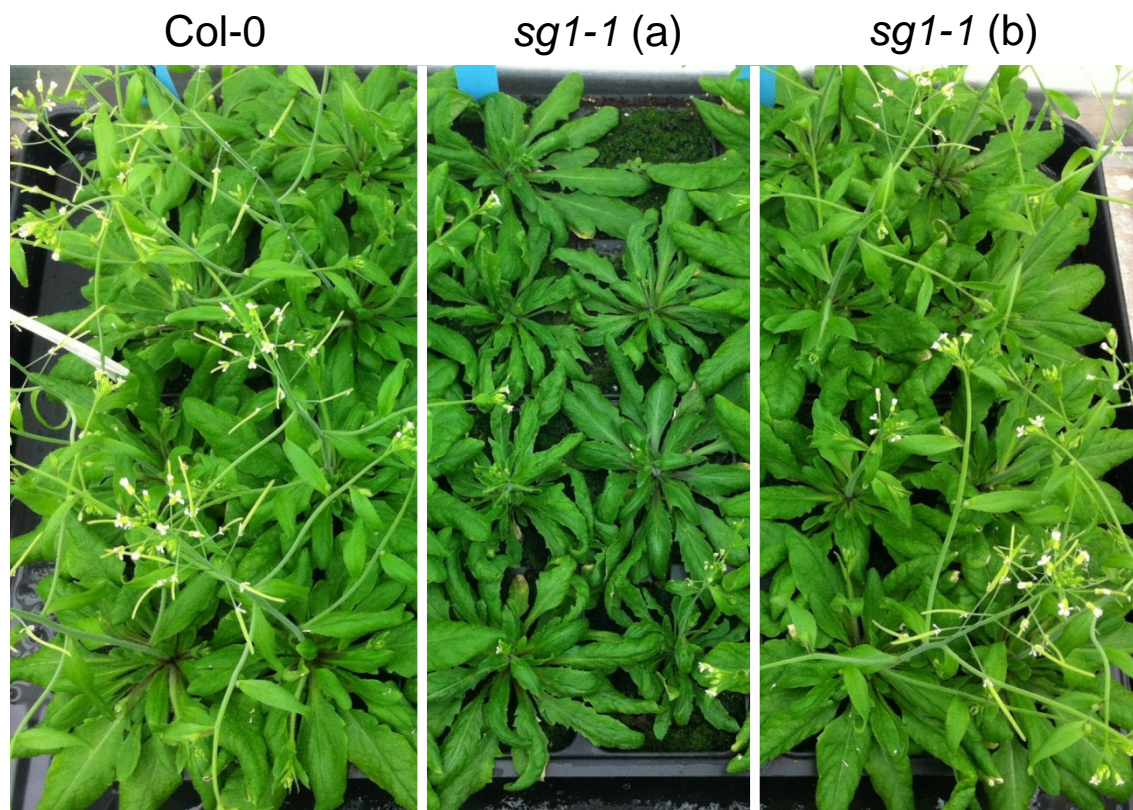



**Figure S5**

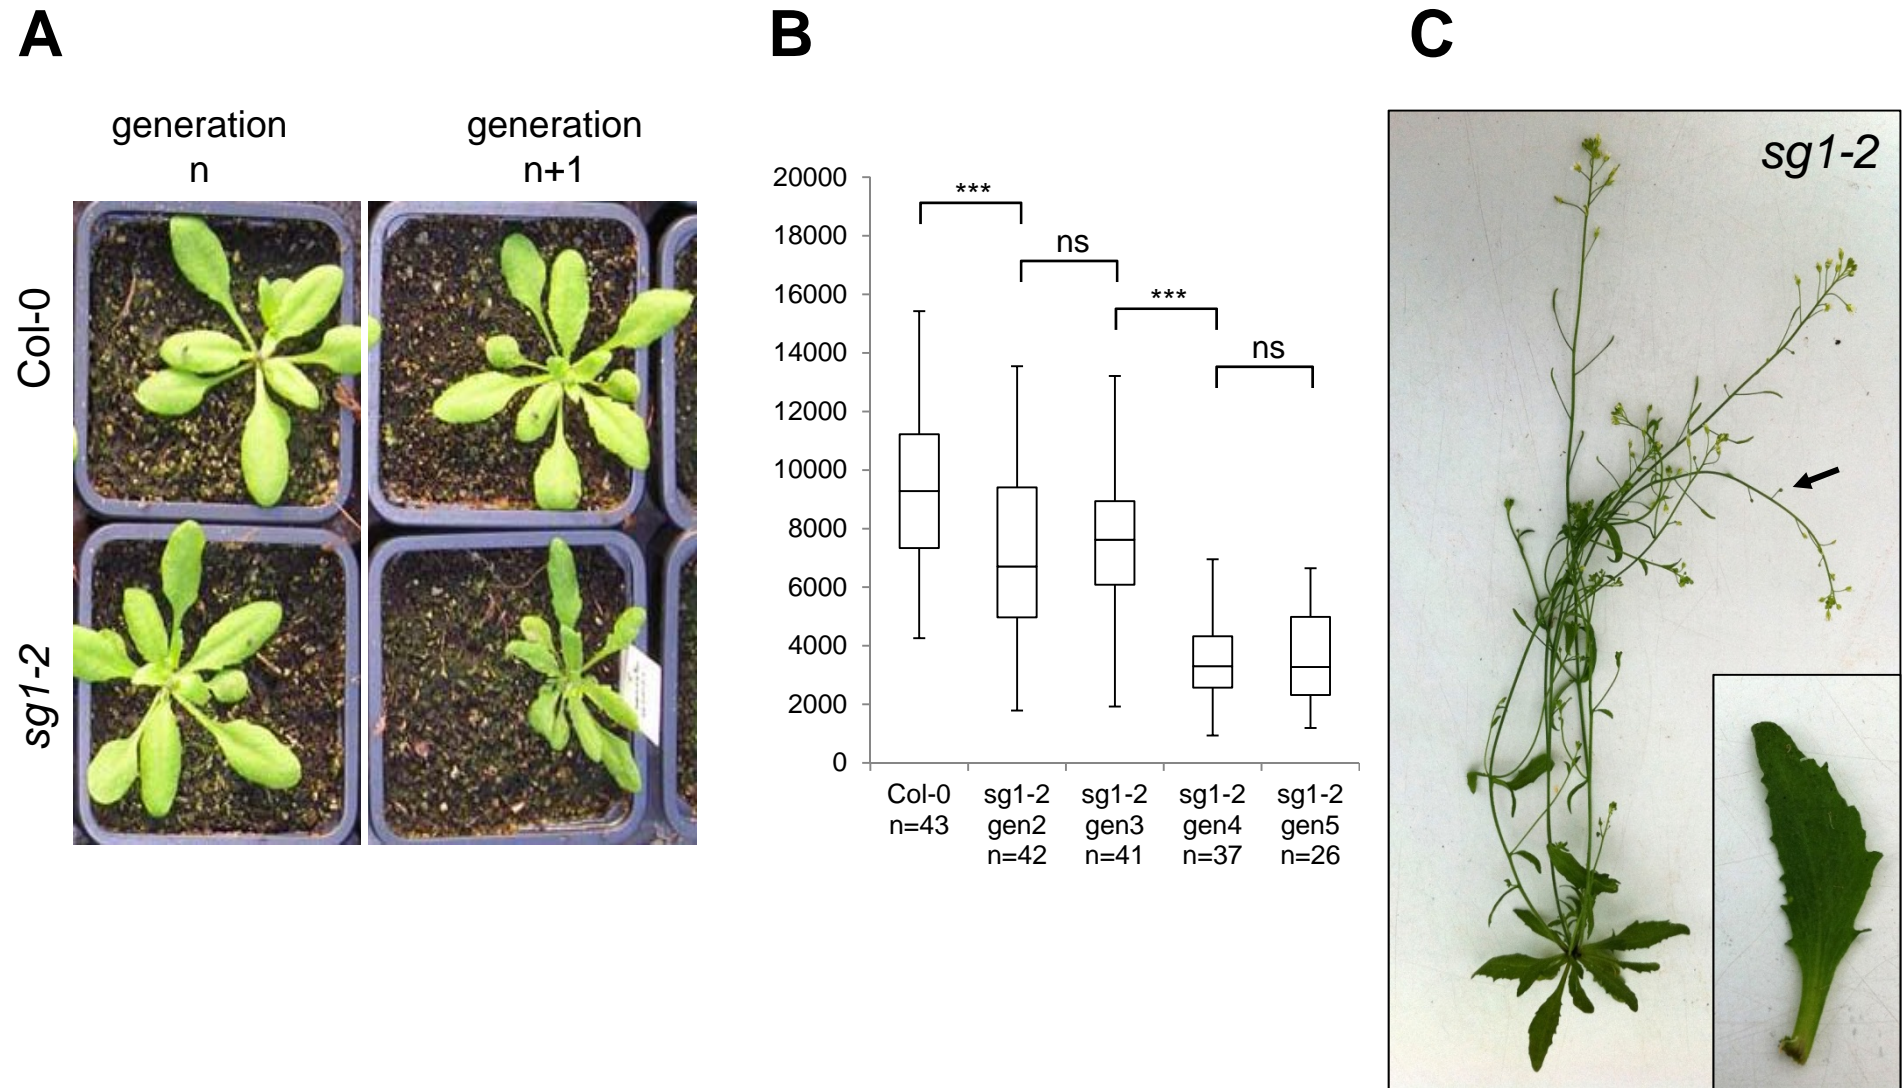



**Figure S5 (continued)**

**D**

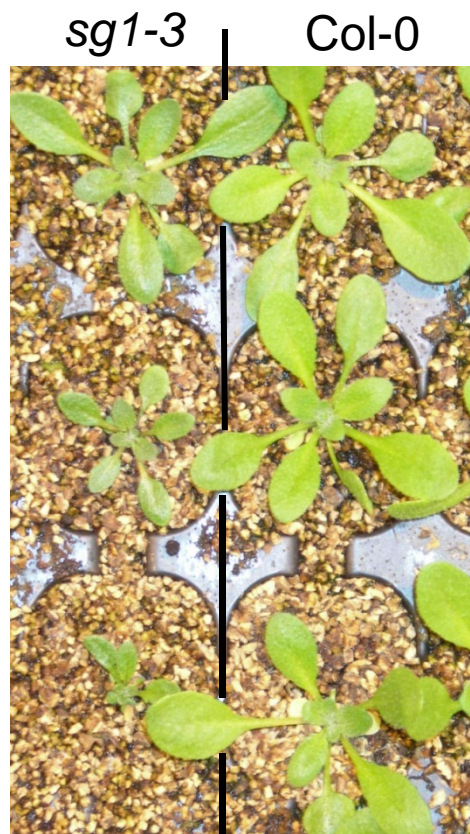



# Figure S6

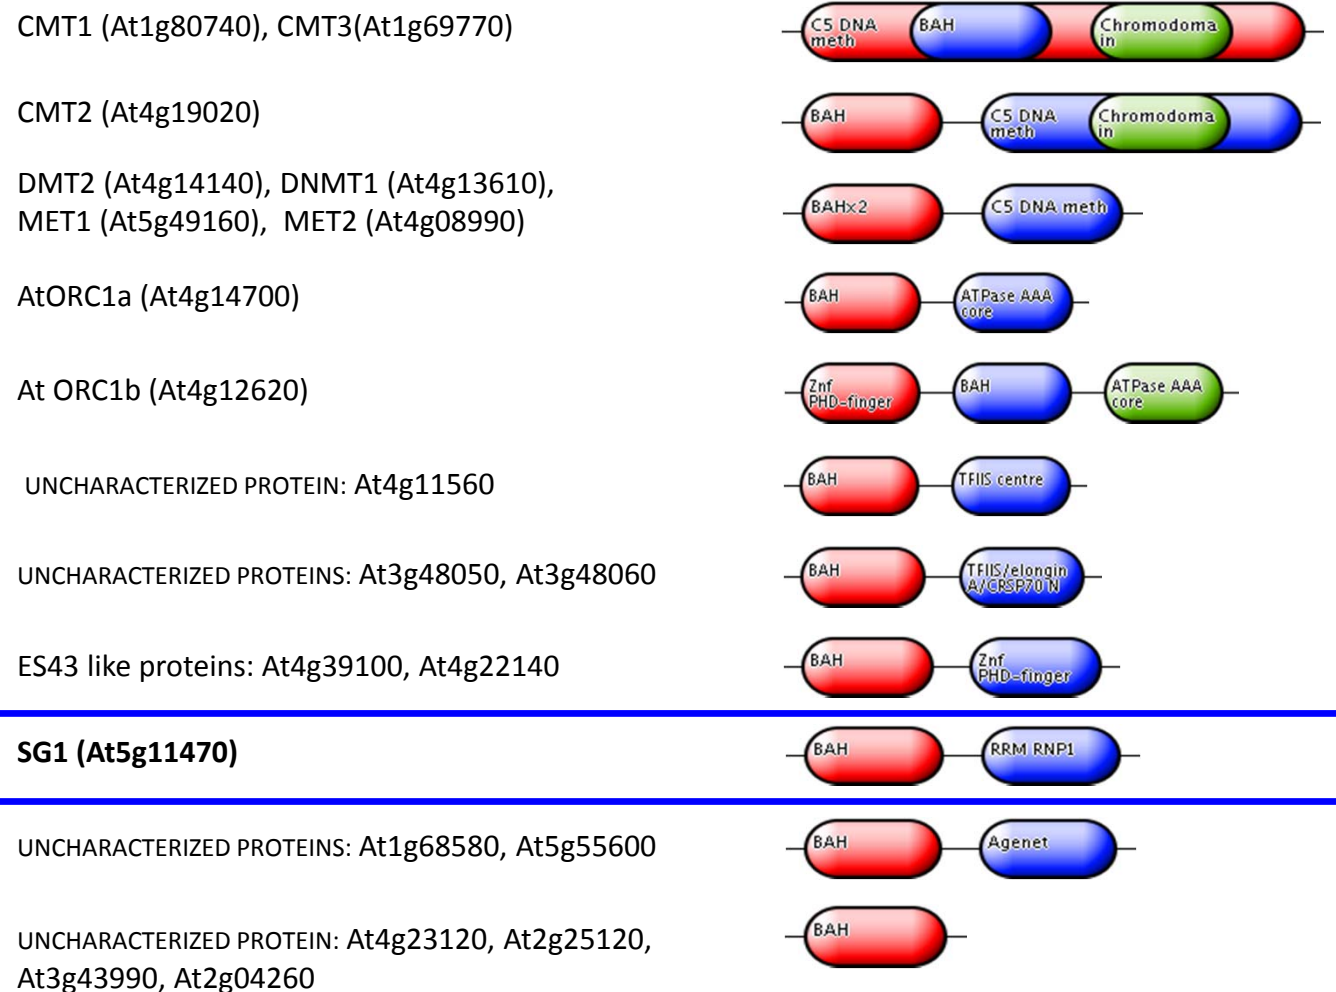



**Figure S7**

**A**

200 bp windows - CG

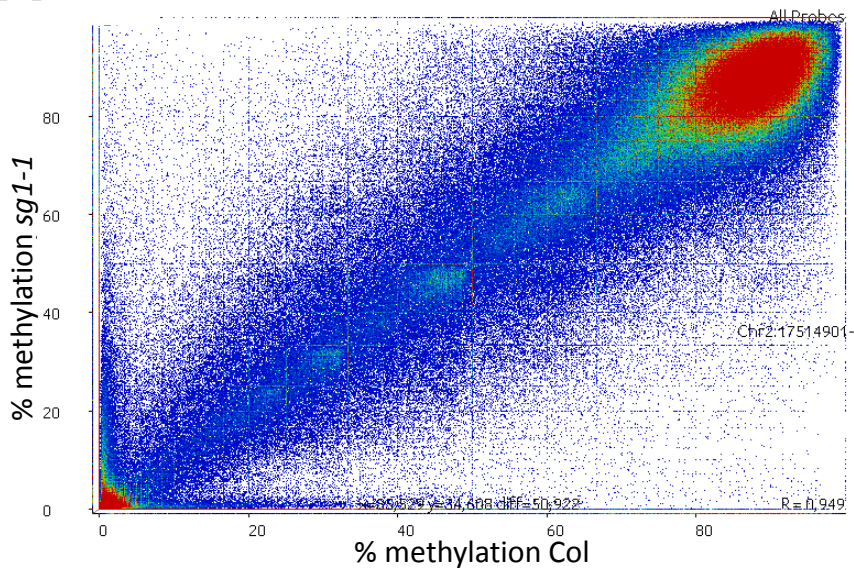

**B**

200 bp windows - CHG

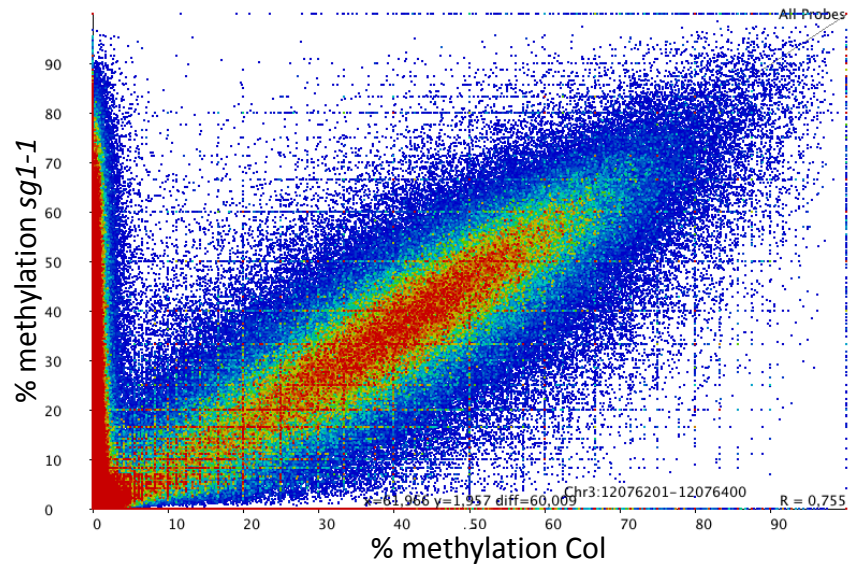

**C**

200 bp windows - CHH

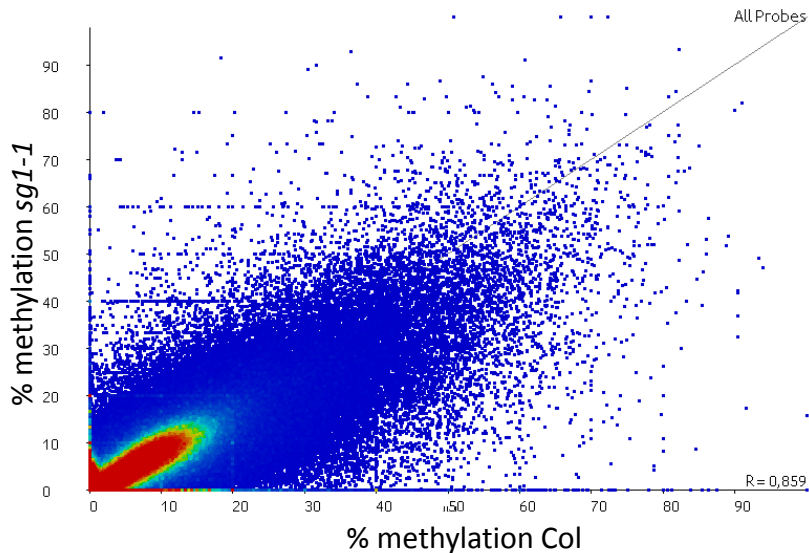



Figure S8

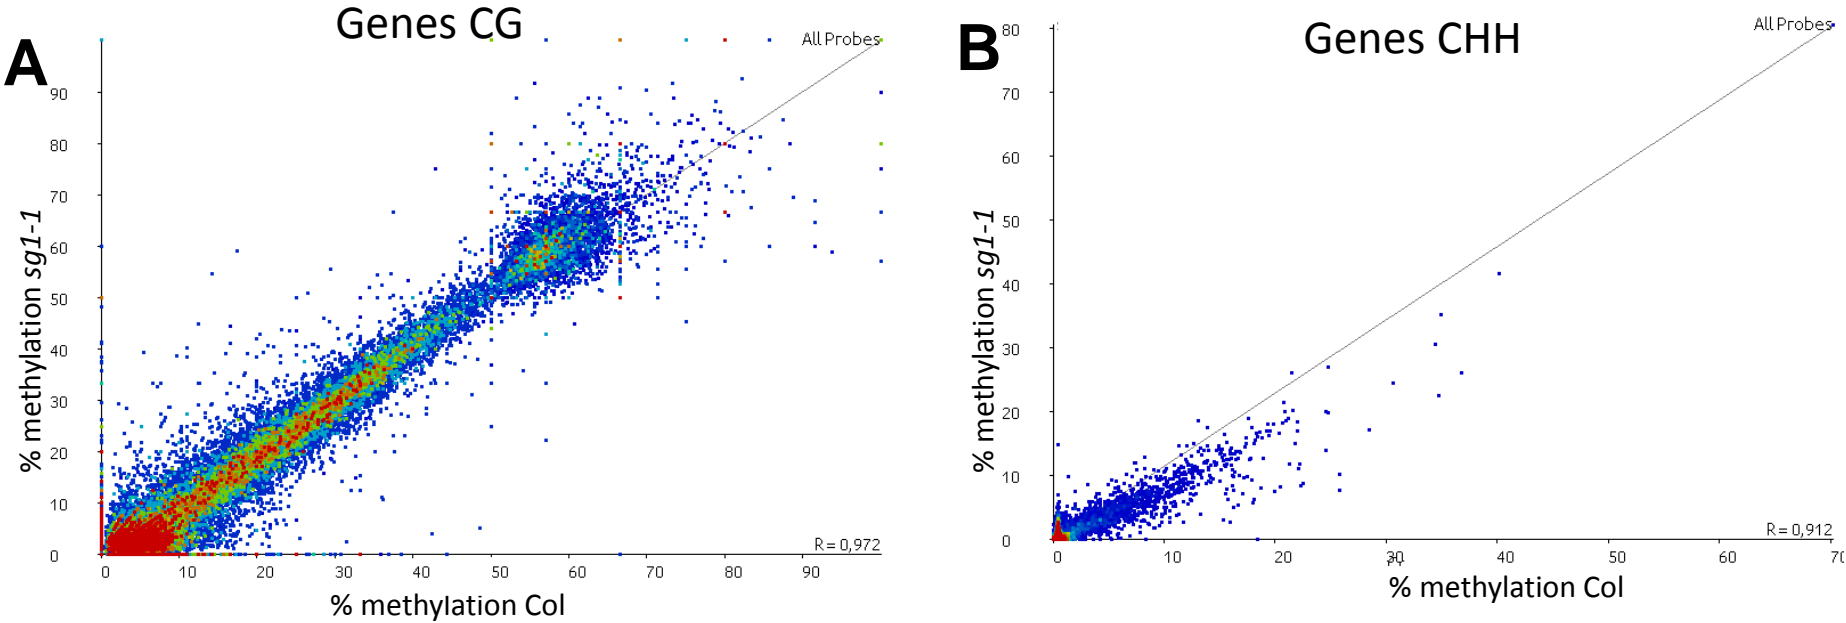



Figure S9

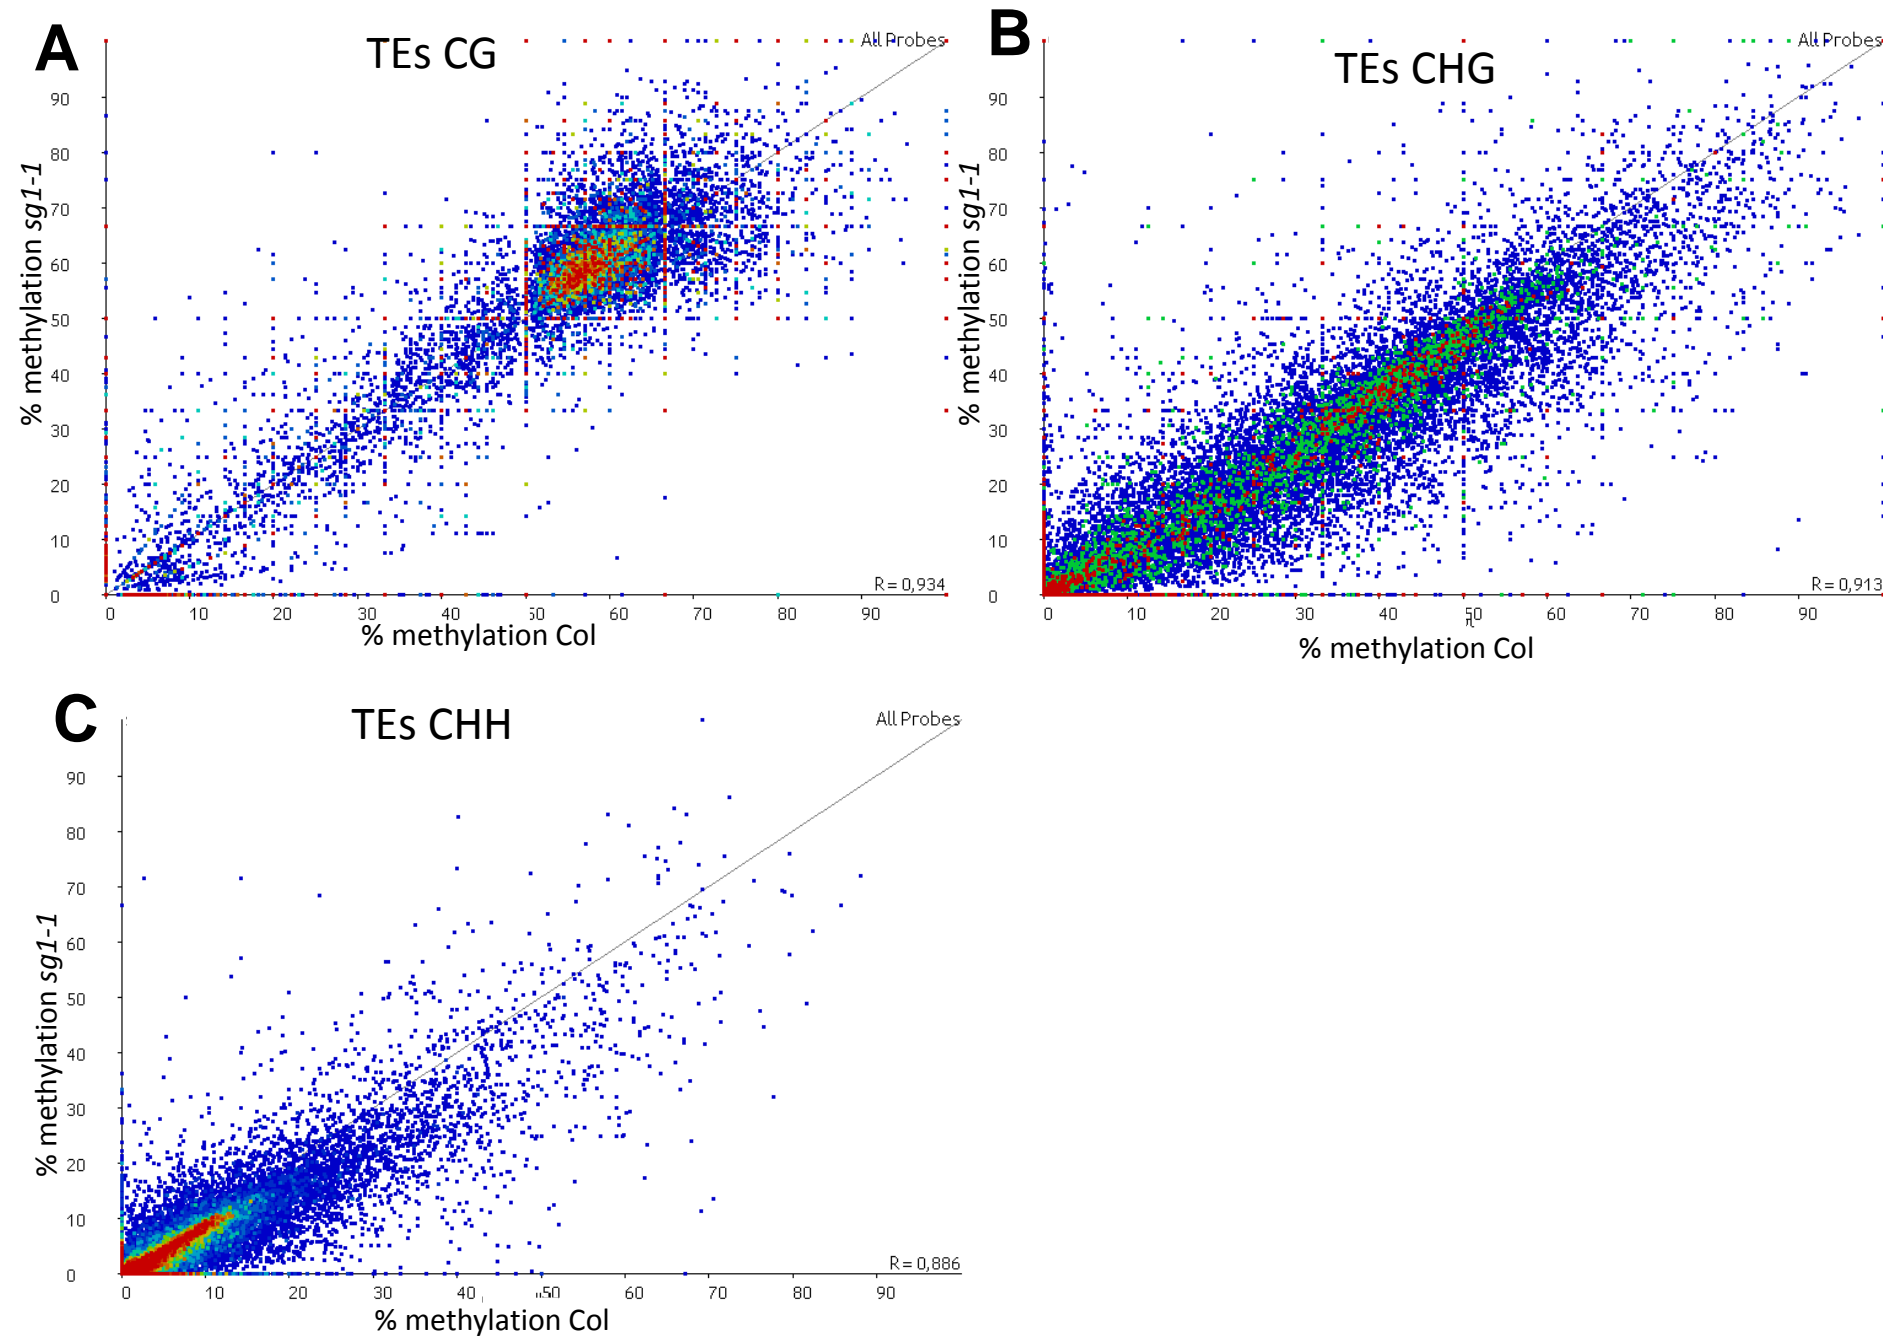



**Figure S10**

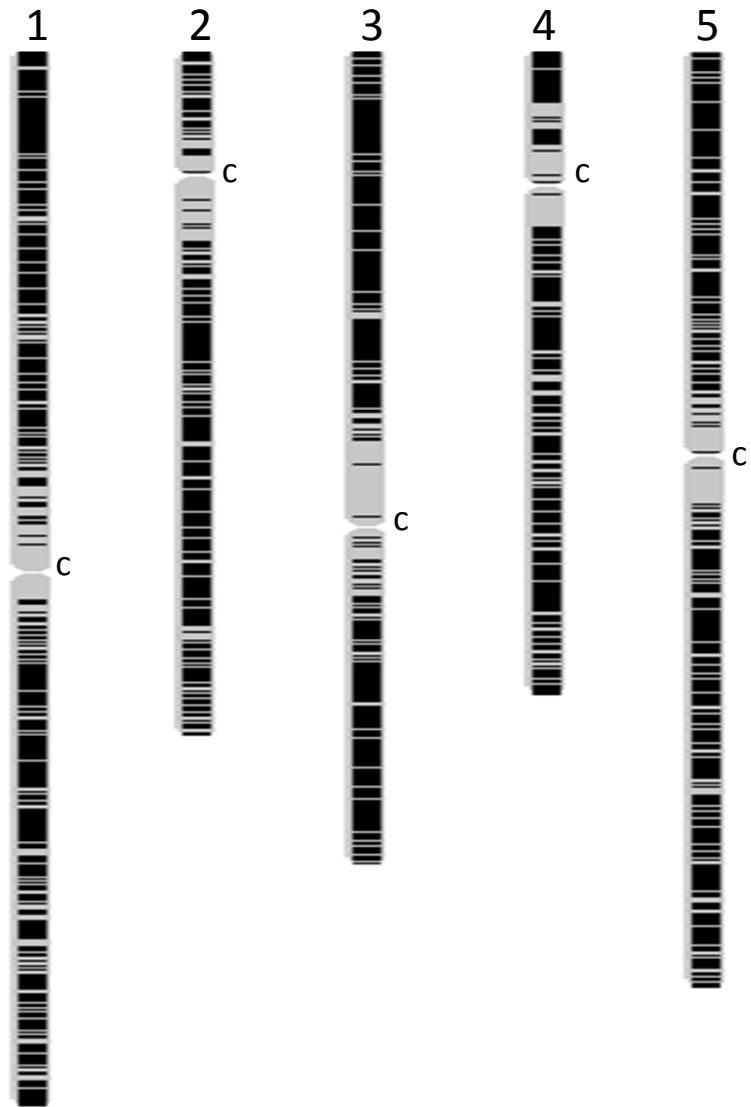



## Figure S11

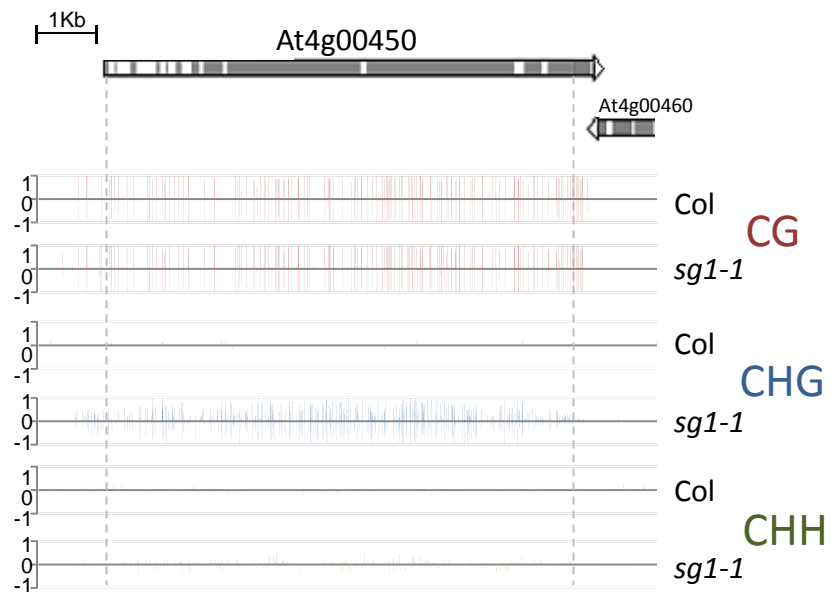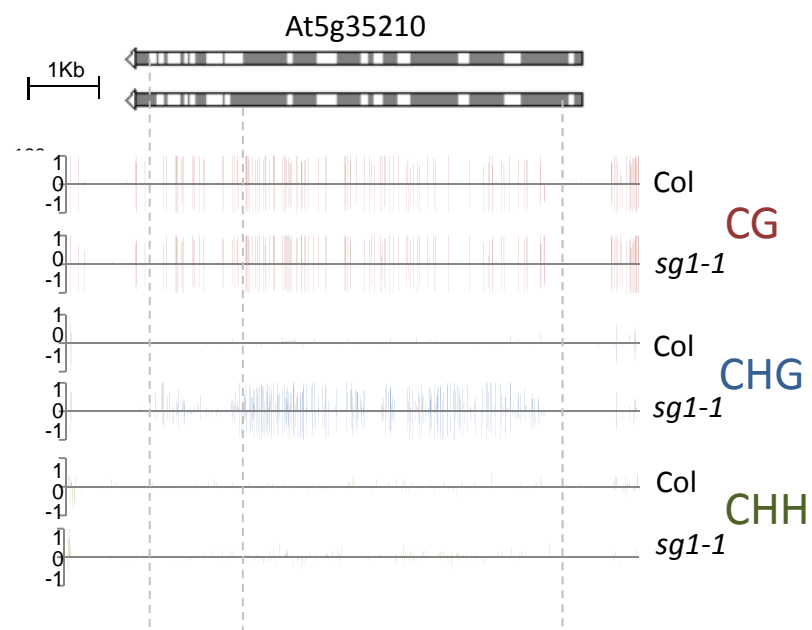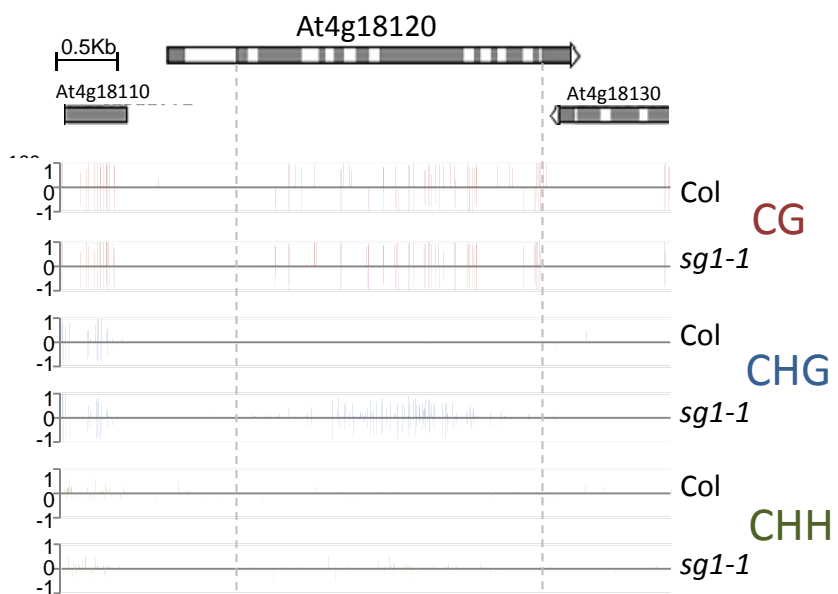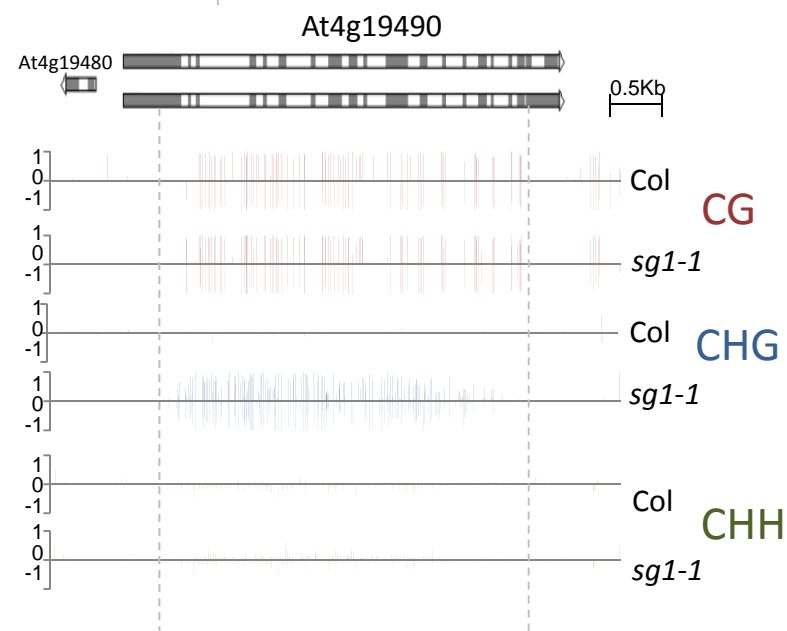



Figure S11 (continued)

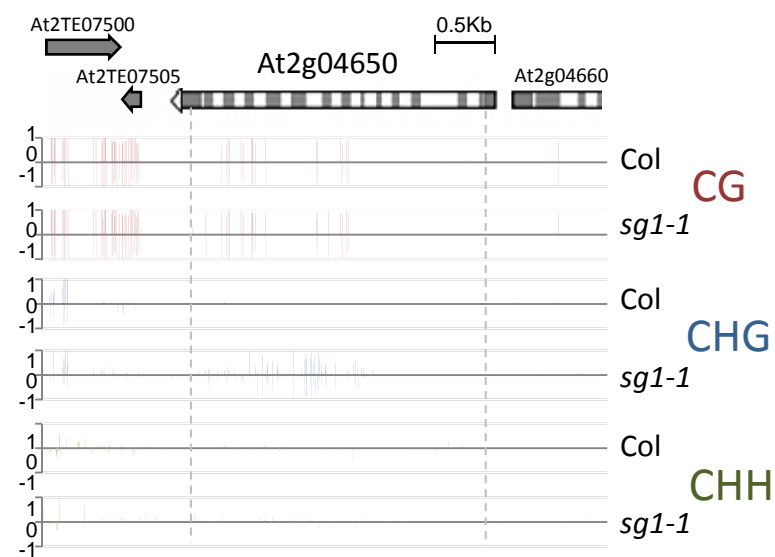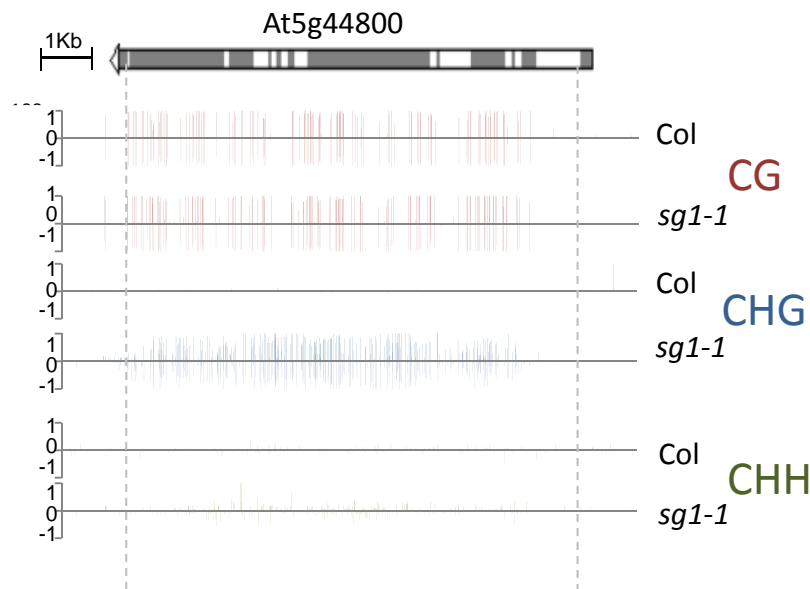



Figure S12

A

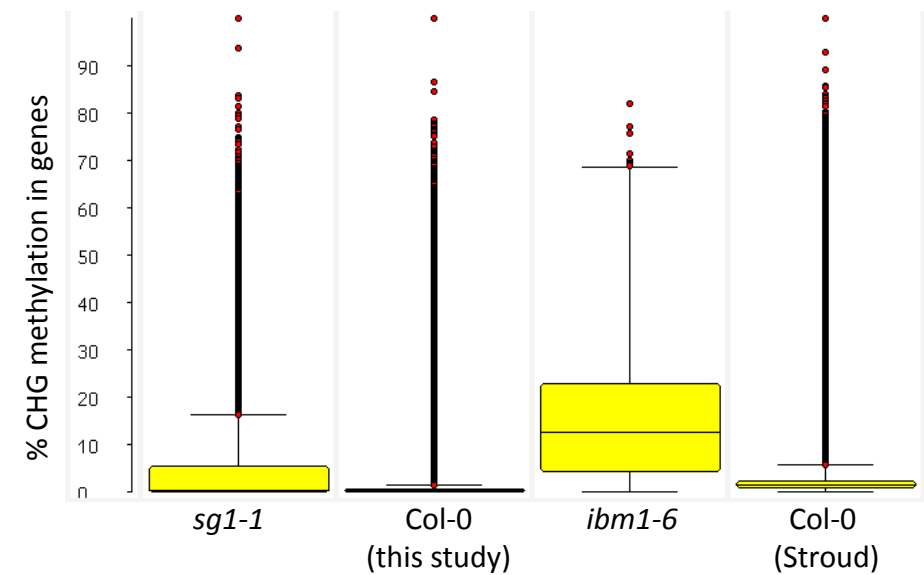

B

Genes CHG

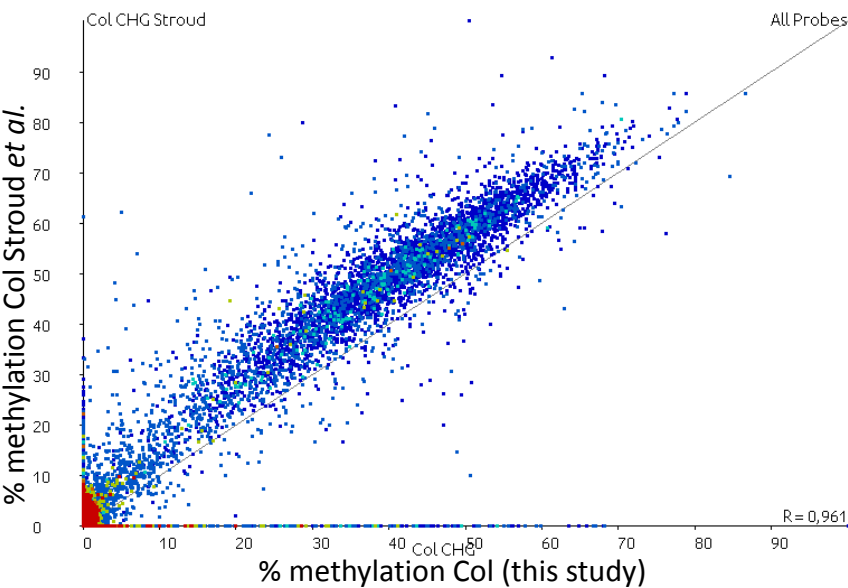



**Figure S13**

**A**

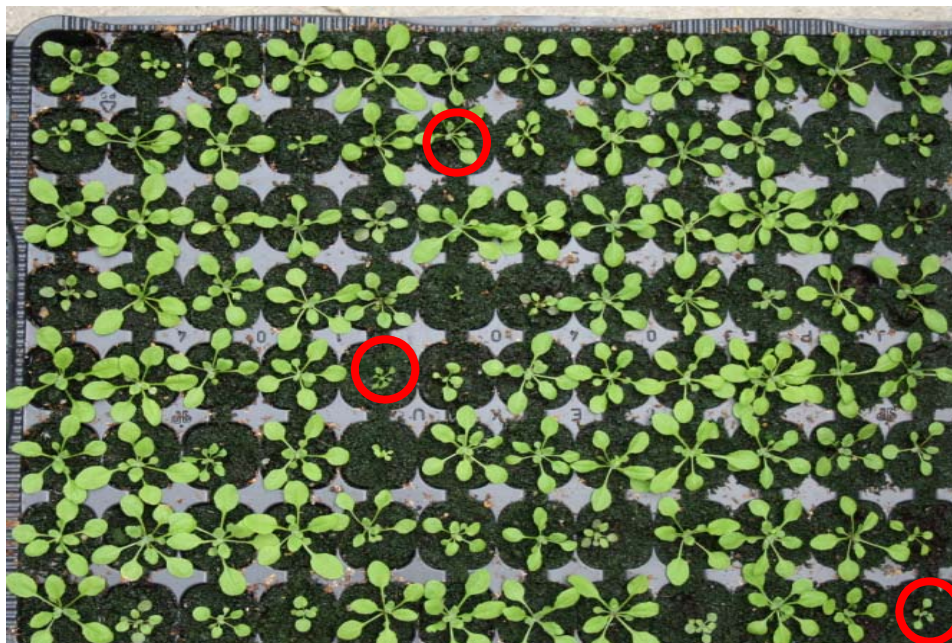

**B**

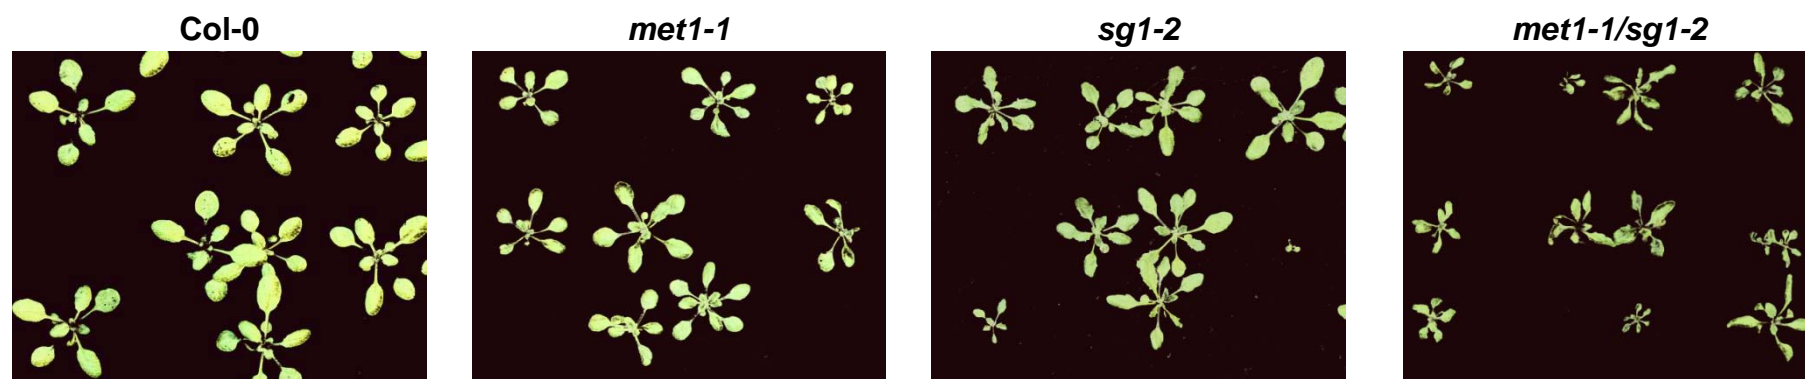



Figure S14

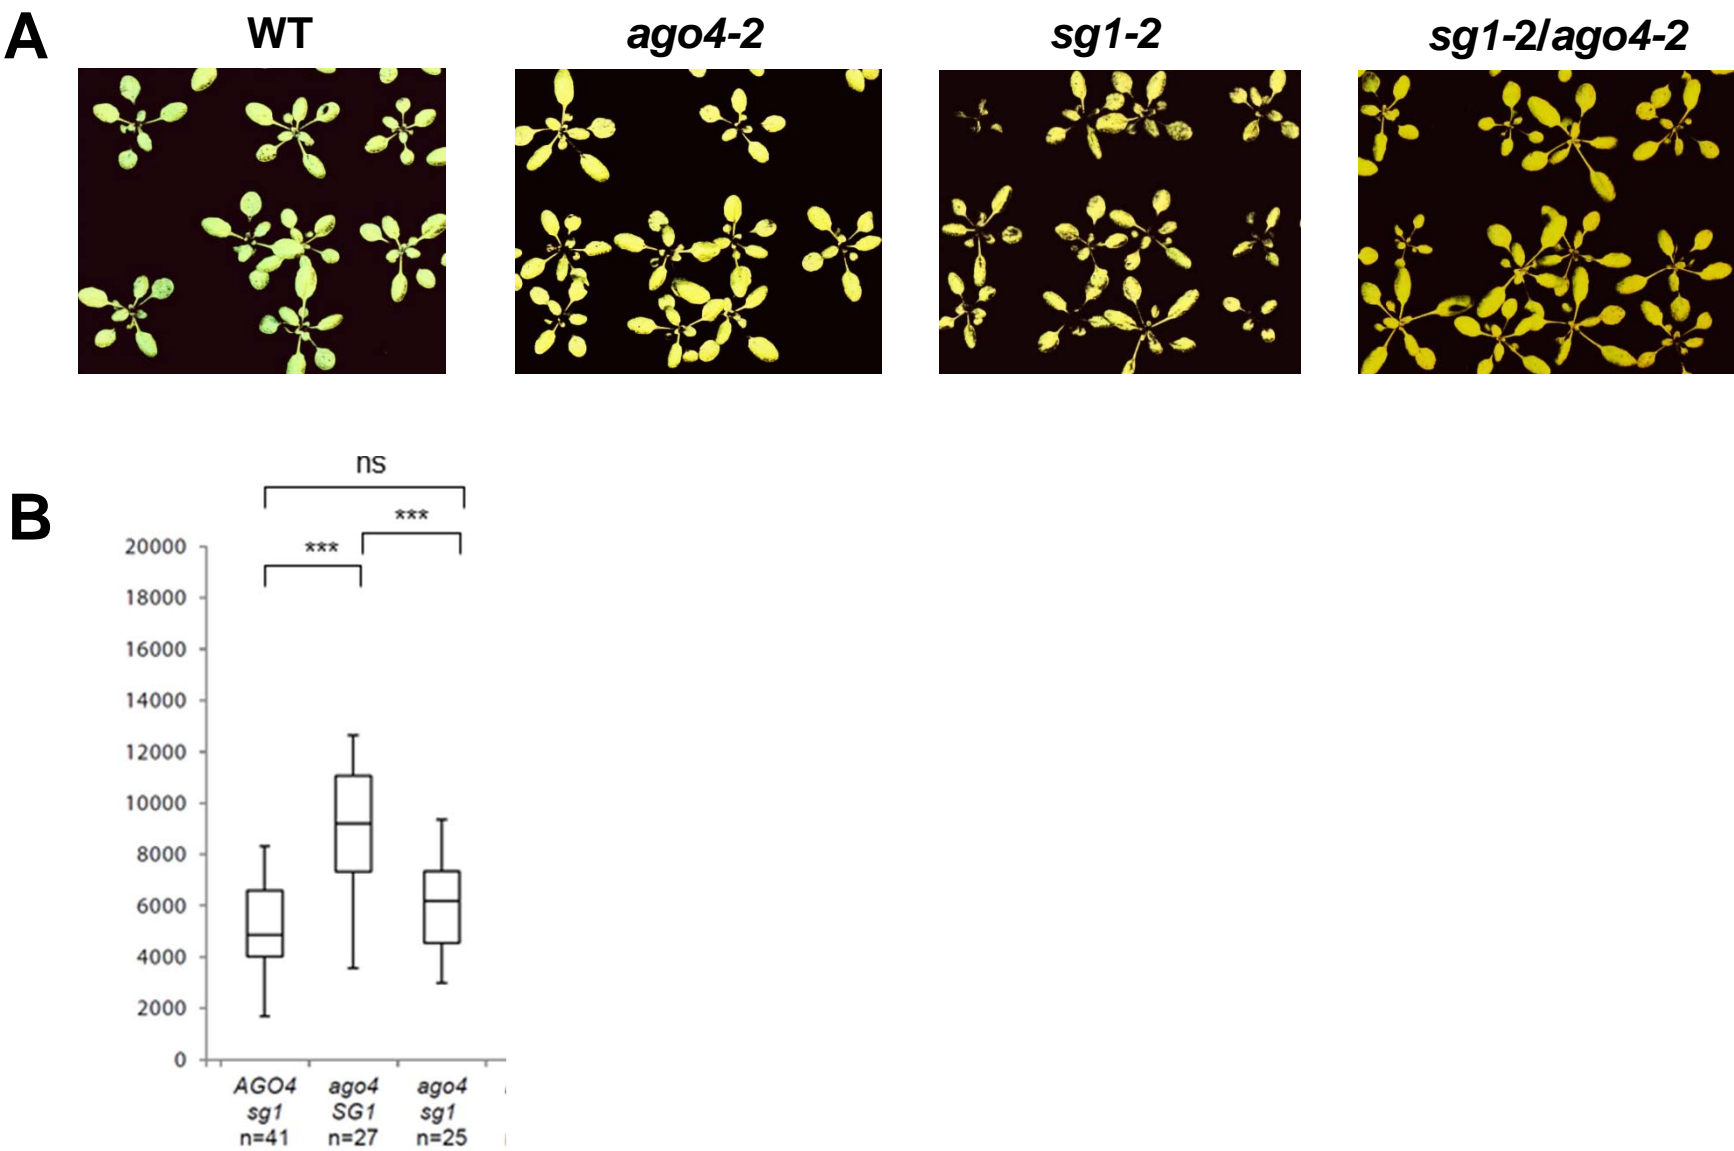



Figure S15

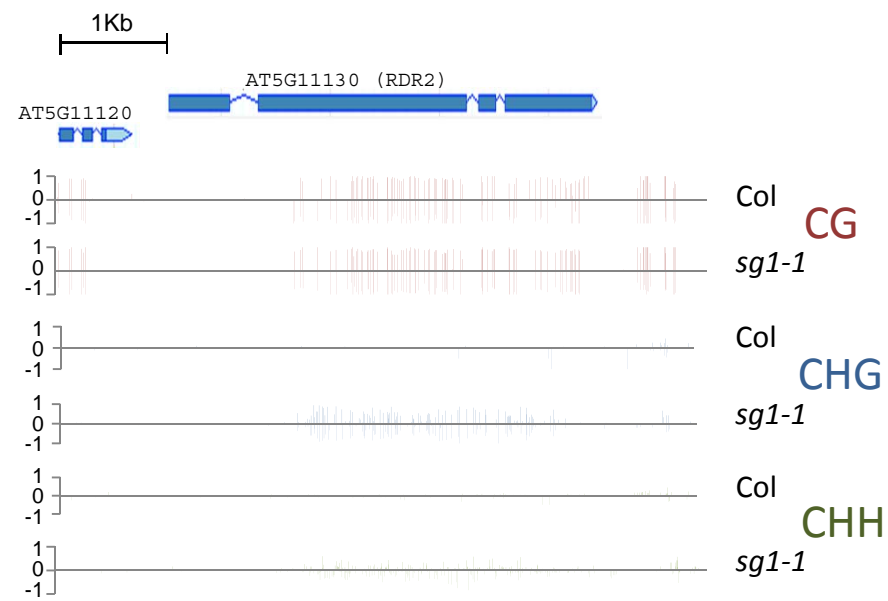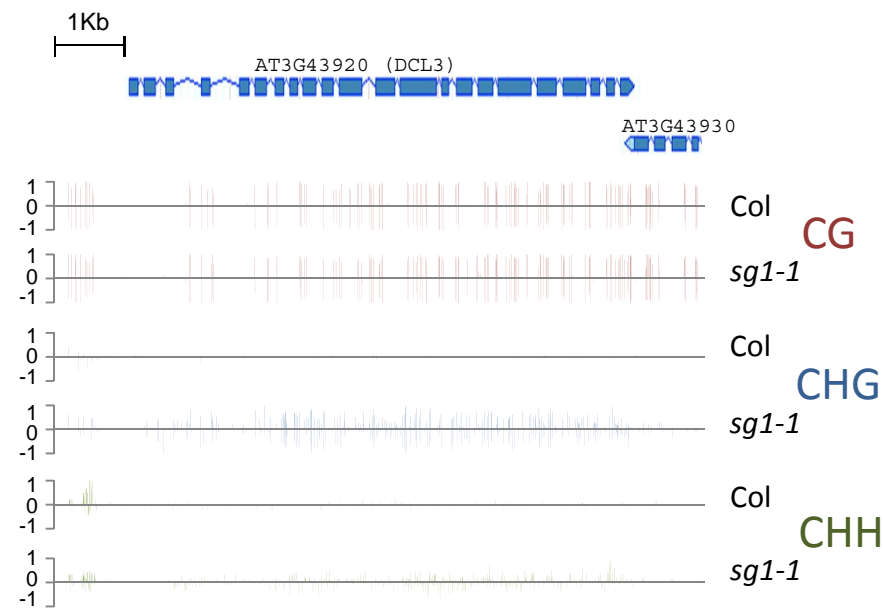



**Figure S16**

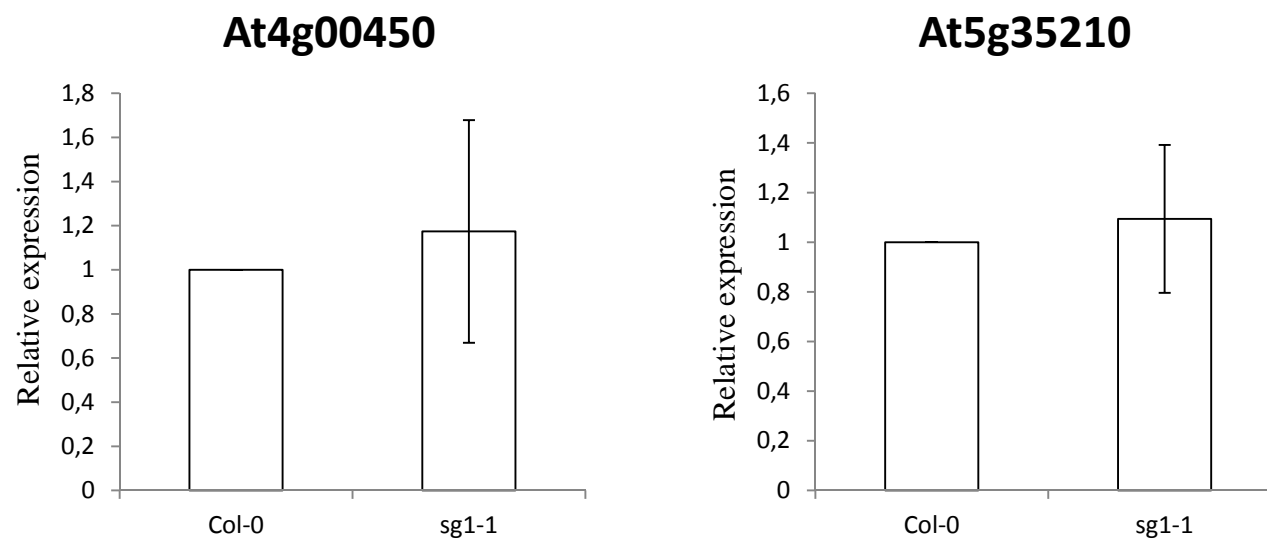



Figure S17

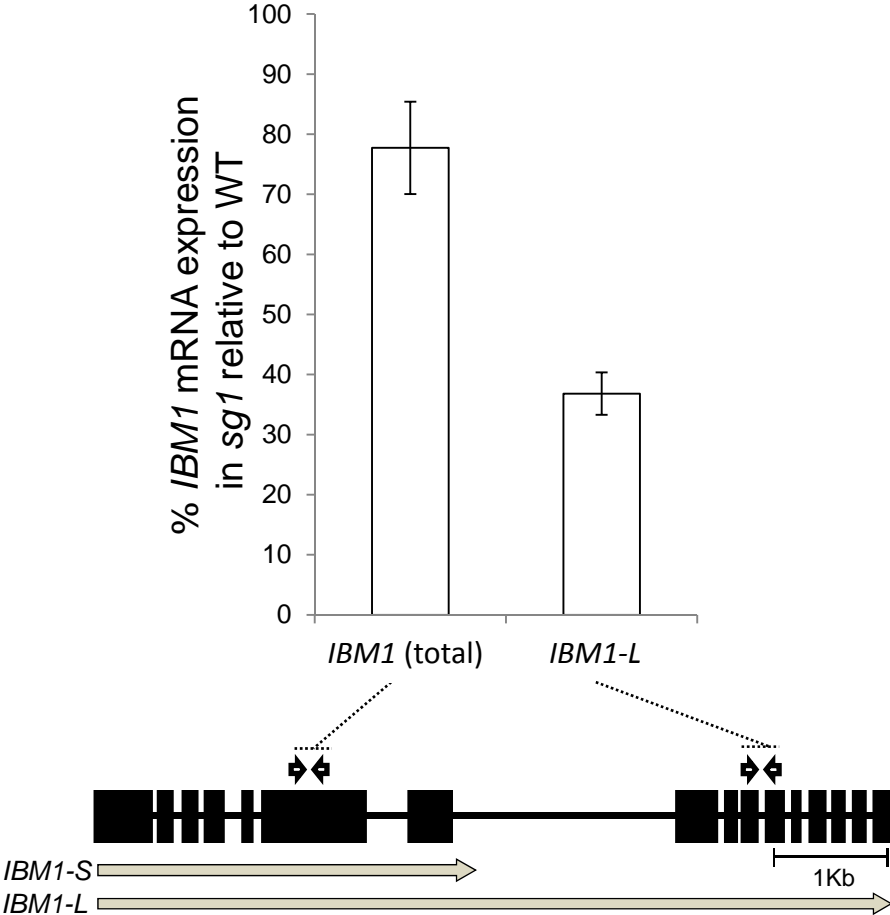



**Figure S18**

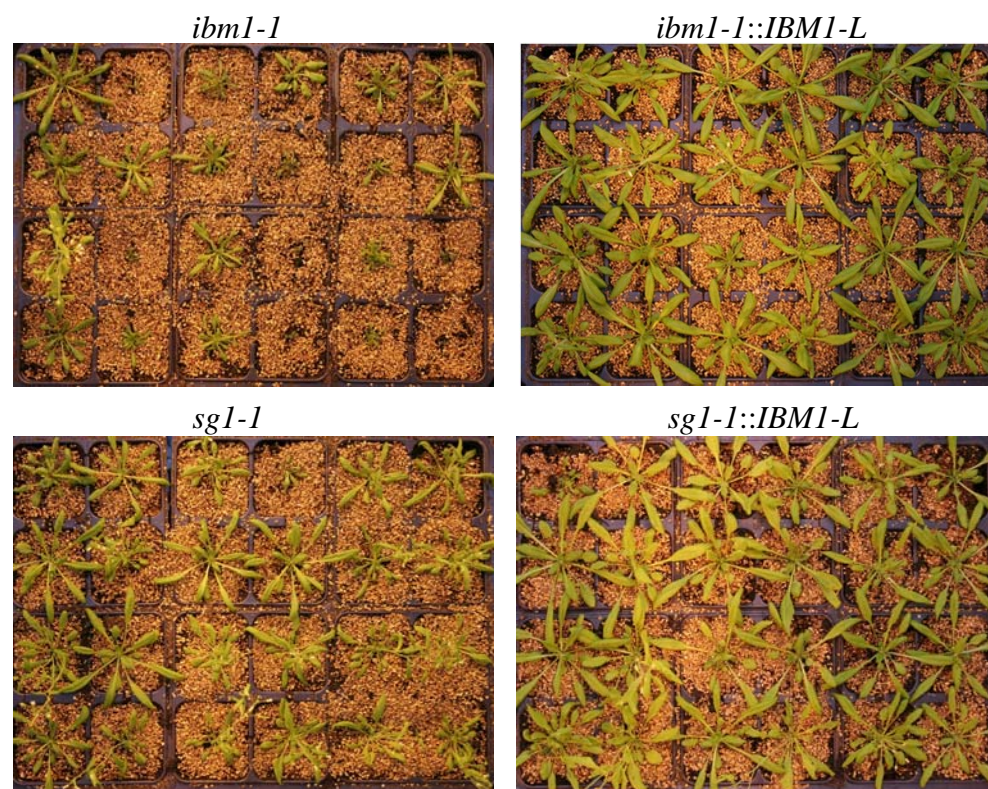



Figure S19

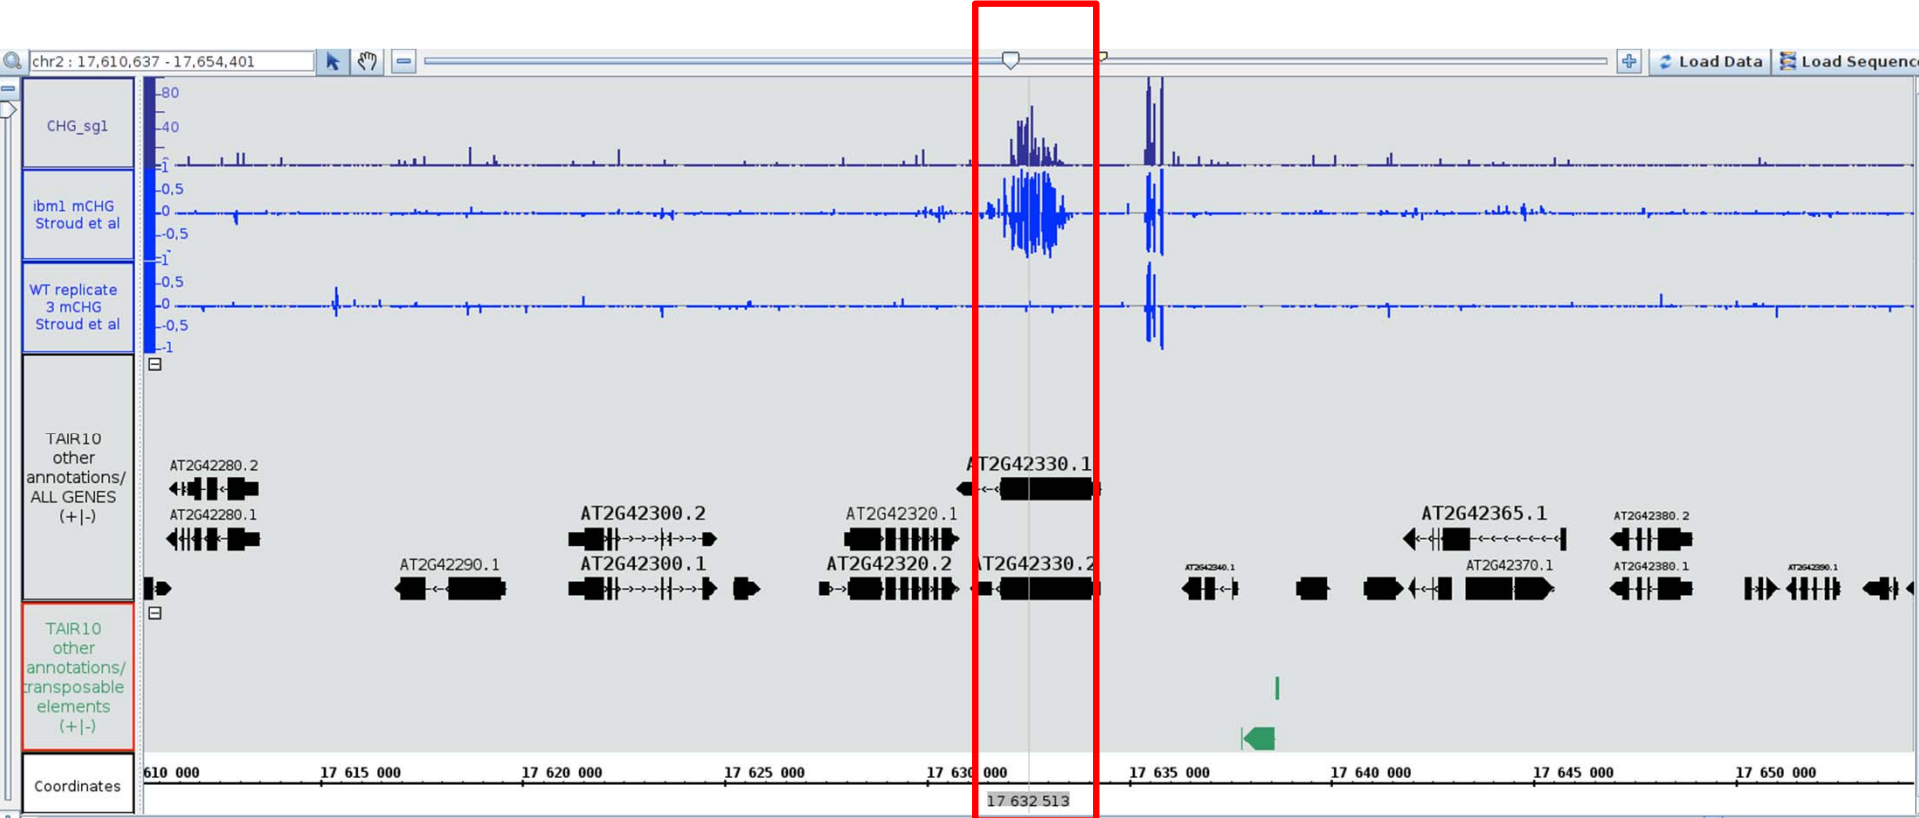



Figure S20

A

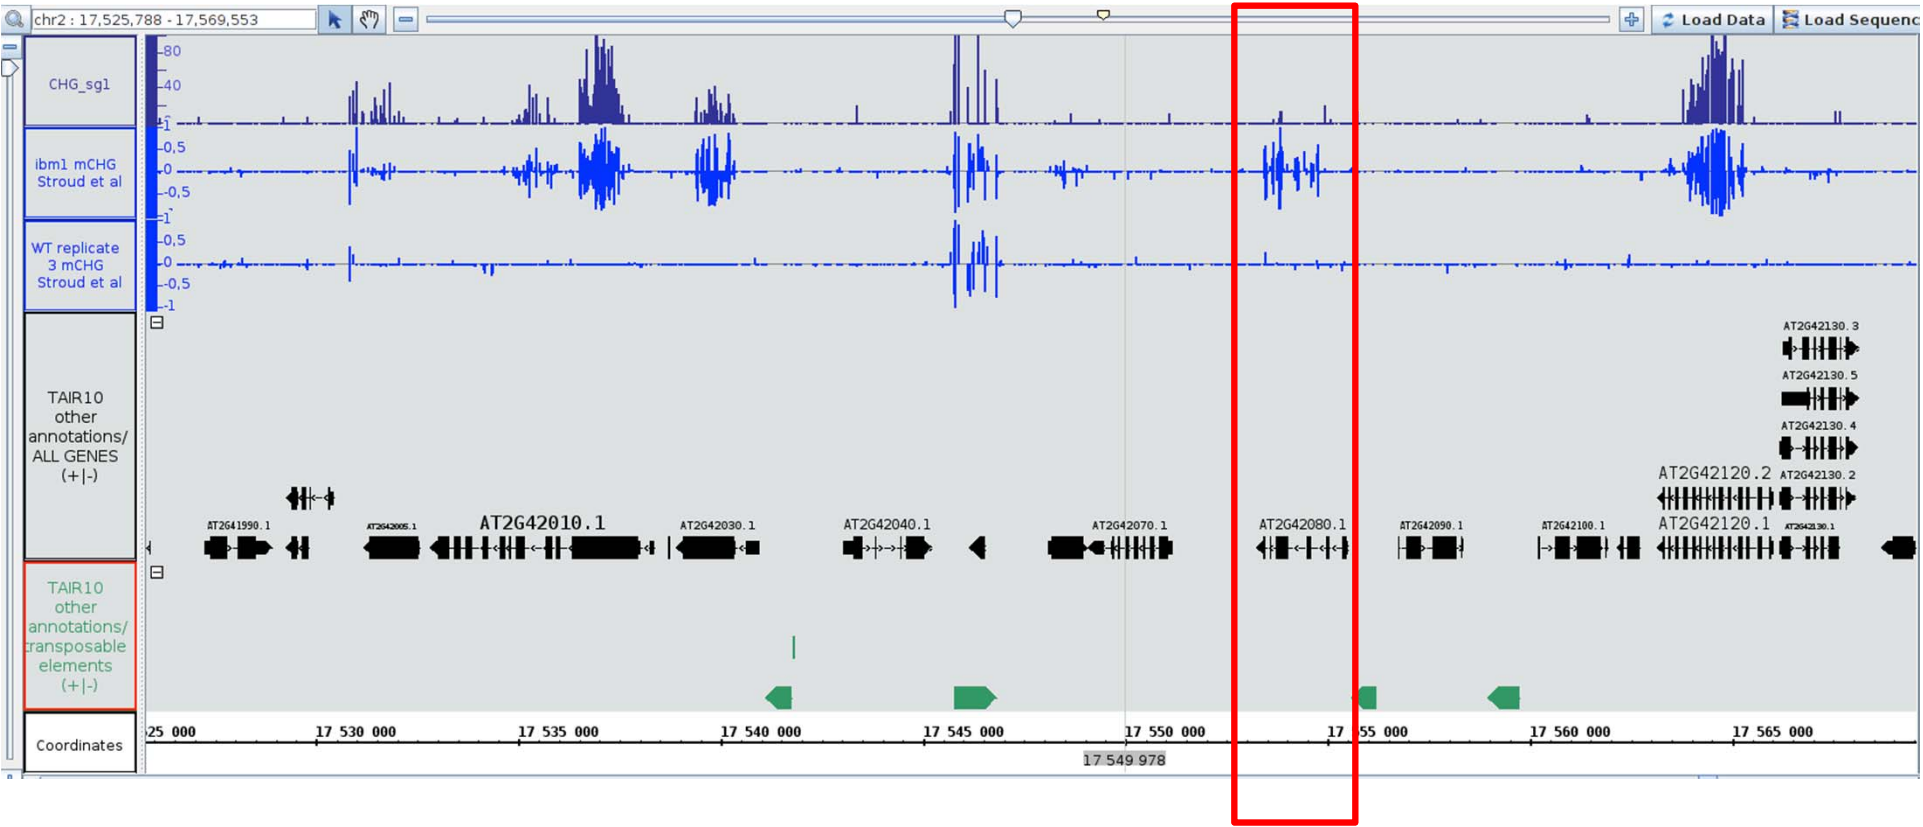



Figure S20 (continued)

**B**

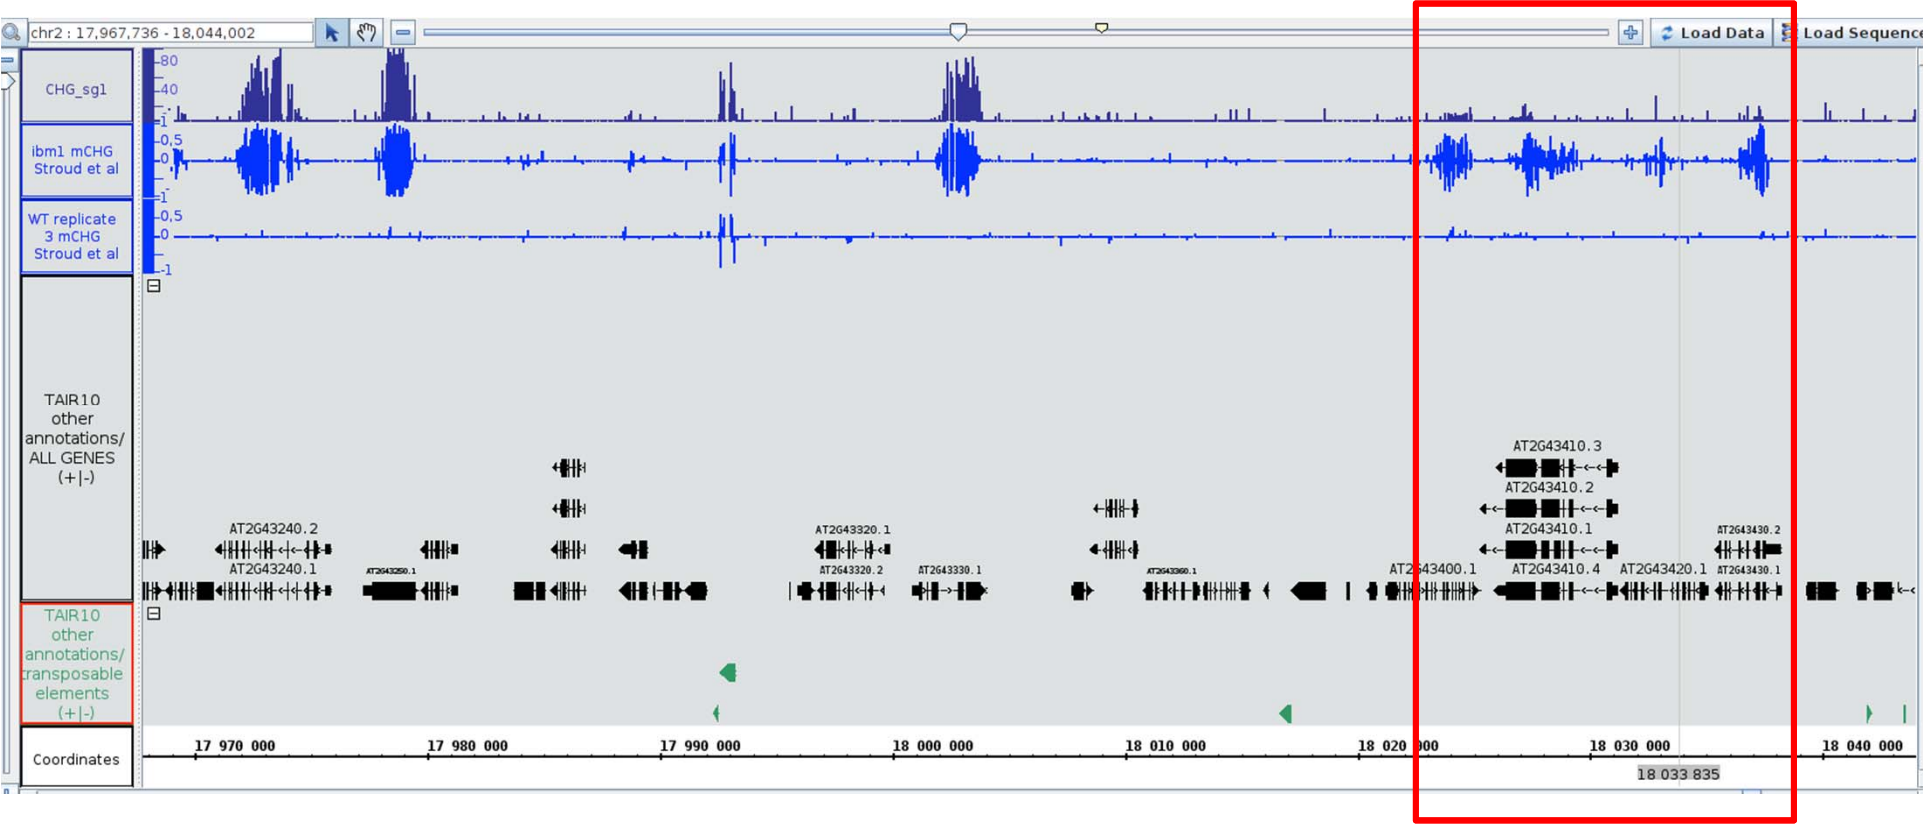

Supplement: pone.0084687.s001.pdf [file pone.0084687.s001.pdf]
